# Supplementary material for: Interleukin-25 Induces Resistance Against Intestinal Trematodes
Source: PubMed Central journal article supplement (PMC5034261; doi:10.1038/srep34142), 2016-09-23
Supplement: srep34142-s1.pdf [file srep34142-s1.pdf]

# **Interleukin-25 Induces Resistance Against Intestinal Trematodes**

**Carla Muñoz-Antoli, Alba Cortés, Rebeca Santano, Javier  
Sotillo, J. Guillermo Esteban, Rafael Toledo**

1 **Supplementary Figure 1. Production of several cytokines was not affected in**  
2 **primary and secondary infections.** Expression of cytokine mRNA in the intestinal  
3 tissue of ICR mice infected, praziquantel (pzq)-treated and reinfected with *Echinostoma*  
4 *caproni* for which no significant changes were detected. The relative quantities (RQ) of  
5 cytokine genes are shown after normalization with  $\beta$ -actin and standardization of the  
6 relative amount against day 0 sample. Vertical bars represent the standard deviation. a:  
7 significant differences with respect to negative controls; b: significant differences  
8 between groups at each week of the study ( $p < 0.05$ ).

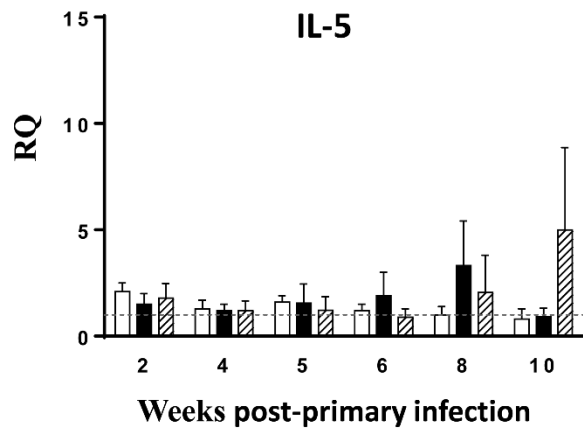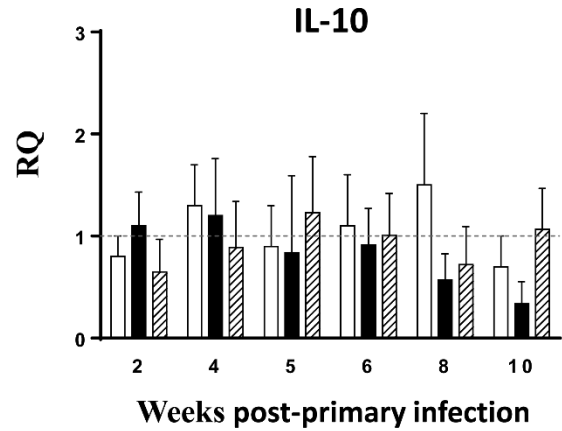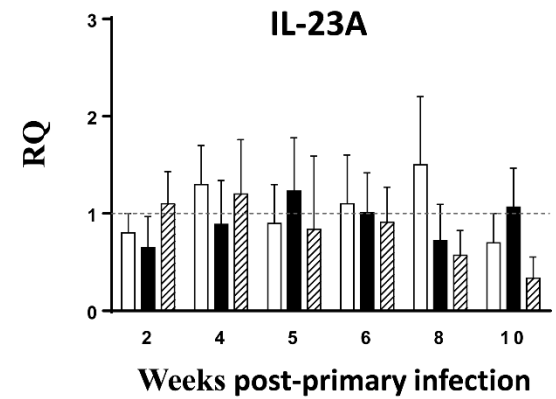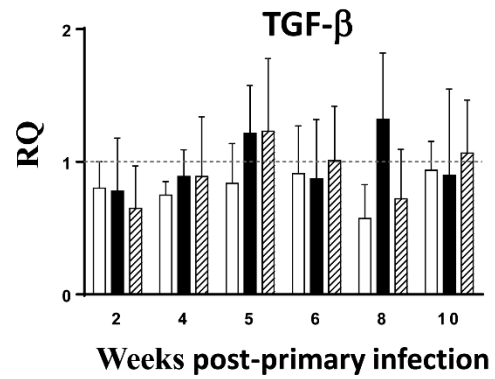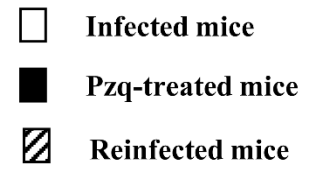

1 **Table S1** Applied Biosystems Inventoried assays used  
Assay ID Details

---

|                | Mice          |
|----------------|---------------|
| $\beta$ -actin | Mm01205647_g1 |
| IL-2           | Mm00434256_m1 |
| IL-4           | Mm00445259_m1 |
| IL-5           | Mm99999063_m1 |
| IL-6           | Mm00446190_m1 |
| IL-9           | Mm00434305_m1 |
| IL-10          | Mm00439614_m1 |
| IL-12p35       | Mn00434165_m1 |
| 2 IL-12p40     | Mn00434174_m1 |
| IL-13          | Mm99999190_m1 |
| IL-17          | Mm00439618_m1 |
| IL-22          | Mm01226722_g1 |

|               |                |
|---------------|----------------|
| IL-23A        | Mn00518984_m1  |
| IL-25         | Mm00499822_m1  |
| IL-33         | Mm00505403_m1  |
| IFN- $\gamma$ | Mm99999071_m1  |
| TGF- $\beta$  | Mn001178820_m1 |
| TNF- $\alpha$ | Mm99999068_m1  |
| TSLP          | Mm01157588_m1  |
| Arg I         | Mm00475988_m1  |
| Arg II        | Mm00477592_m1  |
| Ym-I          | Mm00657889_mH  |
| iNOS          | Mm01309897_m1  |

---

3

4
